# Supplementary material
Source: publisher figshare collection journal article supplement (https://tandf.figshare.com/ndownloader/files/14276801)
Supplement: Supplementary file 1 [file 14276801]

**A Bayesian Framework Allowing Incorporation of Retrospective Information in Prospective Diagnostic Biomarker-validation Designs**

Leandro García Barrado*

Hasselt University, I-Biostat, Agoralaan, B-3590 Diepenbeek, Belgium

leandro.garciabarrado@uhasselt.be

Els Coart

International Drug Development Institute (IDDI), Avenue Provinciale 30, 1340 Louvain-la-Neuve, Belgium

Tomasz Burzykowski

Hasselt University, I-Biostat, Agoralaan, B-3590 Diepenbeek, Belgium, and

International Drug Development Institute (IDDI), Avenue Provinciale 30, 1340 Louvain-la-Neuve, Belgium

Technical Appendix A: -prior distribution approximation

Under the reparameterized -prior definition it can be shown that when assuming that:

the implied -prior distribution can be approximated based on quadratic forms theory [Ruben, 1962; Mathai et al., 1992]. In particular, the distribution can be represented by an expansion in non-central chi-square distributions:

with

where are the eigenvalues of and the vector is a by-product of diagonalizing by P, the p × p orthonormal matrix of eigenvectors of . By using a finite number of terms in the series expansion, it is possible to approximate the distribution of , for different choices of and, with arbitrary precision.

Assume availability of 3 biomarkers. Then the parameters of the considered multivariate normal distribution can be defined as:

and **.**

Figure A1 shows the resulting prior-distributions for several choices of standard deviation and correlation defining . Specifically, standard deviation is varied between 0.2 and 1, while correlation coefficient ranges from 0.1 to 0.9. Results are obtained by simulating 10,000 values of under the proposed parameterization (histograms) as well as considering the non-central chi-square expansion approximation (black solid lines). Although the approximation to higher AUC-values defined by small standard deviation and large correlation combinations breaks down, the approximation is valuable to inspect the overall distributional characteristics. Overall, the resulting prior distributions differ substantially in shape, expressing different a-priori beliefs about .

Figure A1: Histogram (grey) and approximated densities (black solid line) of 10,000 simulated values based on the proposed parameterization in terms of for different combinations of and .

In the paper, the considered -prior is **.** This multivariate normal distributions leads to the -prior shown in Figure A2. In the figure, 10,000 draws from this distribution are denoted by the grey histogram and the approximation is indicated by the black solid line. The mean of this prior distribution is 0.8274 with 95%-equal-tail probability interval equal to [0.6070;0. 9922].


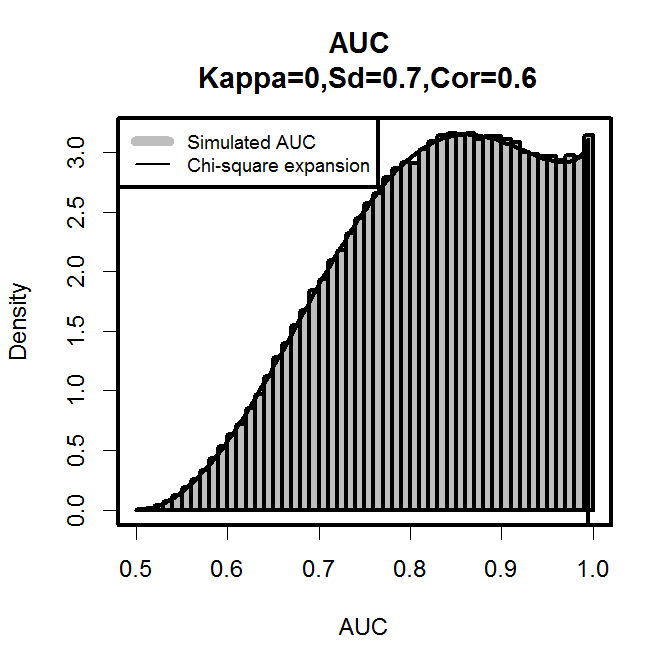


Figure A2. Histogram and approximated density of the -prior distributions implied by the prior-distribution on with mean **0** and variance-covariance matrix defined by standard deviation and correlation coefficient equal to and , respectively.

Technical Appendix B: BUGS code (development study):

## Hyperprior

# Prevalence

theta ~ dunif(TruncPar[1],TruncPar[2]);

# TruncPar = c(1/N,1-(1/N))

### Priors

## Latent true disease status

for(i in 1:N){

D[i] ~ dbern(theta);

D_ind[i] <- D[i] + 1;

}

## Precision matrices

for(Diag.index in 1:2){

# Prior of Cholesky factor of correlation matrix

L[Diag.index,1,1] <- 1;

L[Diag.index,1,2] ~ dunif(-1,1);

L[Diag.index,1,3] ~ dunif(-1,1);

Lim[Diag.index] <- sqrt(1-(pow(L[Diag.index,1,3],2)));

L23[Diag.index] ~ dunif(-1,1);

L[Diag.index,2,3] <-

Lim[Diag.index]*L23[Prec.index];

L[Diag.index,2,2] <- sqrt(1-pow(L[Diag.index,1,2],2));

L[Diag.index,3,3] <- sqrt(1-((pow(L[Diag.index,1,3],2))+(pow(L[Diag.index,2,3],2))));

L[Diag.index,2,1] <- 0;

L[Diag.index,3,1] <- 0;

L[Diag.index,3,2] <- 0;

# Reconstructing correlation matrix

for(k1 in 1:K){

for(k2 in 1:K){

R[Diag.index,k1,k2] <- inprod(L[Diag.index,1:K,k1],L[Diag.index,1:K,k2]);

}

}

# Standard deviation matrix

for(k in 1:K){

Sd[Prec.index,k] ~ dunif(0,1000);

}

# Definition of Variance covariance matrix Sigma

for(k1 in 1:K){

for(k2 in 1:K){

Sigma[Prec.index,k1,k2] <- (equals(k1,k2) * pow(Sd[Prec.index,k1],2)) + ((1-equals(k1,k2))*Sd[Prec.index,k1]*R[Prec.index,k1,k2]*Sd[Prec.index,k2]);

}

}

# Define precision matrix

Prec[Diag.index,1:K,1:K] <- inverse(Sigma[Diag.index,1:K,1:K]);

}

## Scaled difference vector

Delta[1:K] ~ dmnorm(Kappa[1:K],Psy_Inv[1:K,1:K]);

## Cholesky decomposition of inverse of pooled variance covariance matrix

# Pooled Variance Covariance matrix

for(k1 in 1:K){

for(k2 in 1:K){

Sigma_Pooled[k1,k2] <- Sigma[1,k1,k2] + Sigma[2,k1,k2];

}

}

# Inverse of pooled variance covariance matrix

Sigma_Pooled_Inv[1:K,1:K] <- inverse(Sigma_Pooled[1:K,1:K]);

# Cholesky decomposition

Q[1,1] <- sqrt(Sigma_Pooled_Inv[1,1]);

Q[2,1] <- (1/Q[1,1]) * Sigma_Pooled_Inv[2,1];

Q[3,1] <- (1/Q[1,1]) * Sigma_Pooled_Inv[3,1];

Q[1,2] <- 0;

Q[2,2] <- sqrt(Sigma_Pooled_Inv[2,2]-pow(L2[2,1],2));

Q[3,2] <- (1/Q[2,2]) * (Sigma_Pooled_Inv[3,2] - (Q[3,1]*Q[2,1]));

Q[1,3] <- 0;

Q[2,3] <- 0;

Q[3,3] <- sqrt(Sigma_Pooled_Inv[3,3]-(pow(Q[3,1],2)+pow(Q[3,2],2)));

# Inverse of cholesky factor of inverse of pooled variance covariance matrix

Q_Inv[1:K,1:K] <- inverse(L2[1:K,1:K]);

## Normal component means

for(k in 1:K){

Mu[k,1] ~ dnorm(0,1.E-6);

Mu[k,2] <- inprod(Q_Inv[1:K,k],ScD[1:K]) + Mu[k,1];

}

## Clinical diagnosis parameters

Se ~ dbeta(1,1)T(0.51,);

Sp ~ dbeta(1,1)T(0.51,);

## Likelihood

for(i in 1:N){

# Continuous Biomarker part

Y[i,1:K] ~ dmnorm(mean[i,],Prec[D_ind[i],,]);

for(k in 1:K){

mean[i,k] <- (Mu[k,1] * (2-D_ind[i])) + (Mu[k,2] * (D_ind[i]-1));

}

# Clinical diagnosis part

T[i] ~ dbern(ProbT[i]);

ProbT[i] <- (Se * (D_ind[i]-1)) + ((1-Sp) * (2-D_ind[i]));

}

## Functions of parameters

for(k in 1:K){

# Linear coefficients a

Mu_diff[k] <- Mu[k,2] - Mu[k,1];

a[k] <- inprod(Sigma_Pooled_Inv[k,1:K],Mu_diff[1:K]);

}

# AUC

AUC <- phi(pow(inprod(a[1:K],Mu_diff[1:K]),0.5));

Technical Appendix C: -posterior approximation on -scale

Figure C1 shows the -posteriors and its normal and log-normal approximations depicted in Figure 1 of the main text, on the -scale. The transformation leads to the same conclusions with respect to the best fitting approximation in terms of underlying value and development study sample size. When the underlying value equals 0.6 and the development study sample size is 150, the log-normal approximation captures the mode of the transformed -distribution best. In case development study sample size is equal to 400 (indicated in the right-hand-side column of Figure C1), the normal-approximation captures the mode of the transformed posterior distribution better. The results shown in Figure C1 show that the conclusions from the simulation exercise transfer to the AUC-scale. In particular, they show that the transformed posterior distribution of can be approximated well by a transformed normal distribution with mean and variance equal to the respective mean and variance of the MCMC samples of obtained in the development study if sample size is sufficient.

Figure C1. Empirical posterior distributions resulting from data with different accuracy (rows) and sample sizes (columns) transformed to the AUC-scale. The dashed lines denote the transformed log-normal (grey) and normal (black) approximation. **a.** Posterior of data with . **b**. and **c**. . The left‑hand‑side column shows results for , the right‑hand‑side column for .

Technical Appendix D: BUGS code (validation study):

## Hyperpriors

# Prevalence

theta ~ dunif(TruncPar[1],TruncPar[2]);

# TruncPar = c(1/N,1-(1/N))

### Priors

## Latent true disease status

for(i in 1:N){

D[i] ~ dbern(theta);

D_ind[i] <- D[i] + 1;

}

## Precisions

# Standard deviations

for(k in 1:2){

Sd[k] ~ dunif(0,1000);

Prec[k] <- pow(Sd[k],-2);

Var[k] <- pow(Sd[k],2);

}

# Pooled variance

sum_var <- Var[1] + Var[2];

pooled_var <- pow(sum_var,0.5);

## Scaled difference vector

gamma ~ dnorm(mean_gamma,prec_gamma);

## Normal component means

Mu[1] ~ dnorm(0,1.E-6);

Mu[2] <- (gamma*pooled_var) + Mu[1];

## Clinical diagnosis parameters

Se ~ dbeta(1,1)T(0.51,);

Sp ~ dbeta(1,1)T(0.51,);

## Likelihood

for(i in 1:N){

# Continuous Biomarker part

Y[i] ~ dnorm(mean[i],Prec[D_ind[i]]);

mean[i] <- (Mu[1] * (2-D_ind[i])) + (Mu[2] * (D_ind[i]-1));

# Clinical diagnosis part

T[i] ~ dbern(ProbT[i]);

ProbT[i] <- (Se * (D_ind[i]-1)) + ((1-Sp) * (2-D_ind[i]));

}

# Biomarker performance measure AUC

AUC <- phi(AUC_star);

Technical Appendix E: Type-I error calibration:

The Type-I error probability for the considered models was defined as the proportion of simulated validation study data sets for which the posterior probability of being smaller or equal to 0.75 was smaller than . In other words, i.e., the proportion of validation data sets simulated under for which the null-hypothesis was incorrectly rejected.

In order to obtain empirical estimates of the Type-I error probability, the described simulation study was repeated on validation study data satisfying the null-hypothesis. To achieve this, data were simulated based on the parameter values shown in Table E.1. To obtain data under , the distance between the means of the multivariate normal distributions of subjects with and without the condition of interest was decreased to yield .

For each of the considered sample sizes, 1000 ‑validation datasets were simulated, based on the parameter values shown in Table E.1. These data were analyzed by considering all validation‑dataset sample sizes, design settings, and development study combinations, leading to 64 empirical Type-I error probability estimates.

Since comparing the empirical power estimates of settings for which the results are characterized by a different Type-I error probability is meaningless, we adjusted the validation‑criterion probabilities for all model settings to calibrate the Type-I error probabilities at 0.05.

The results of this exercise are presented in Table E.2. It is clear from this table that substantial correction of the validation‑criterion probabilities is required to control the Type-I error. The corrected values from Table E.2 were considered in the main simulation study, in order to meaningfully compare the empirical power estimates for the considered design settings.

Table E.1.: Parameter values considered under the null-hypothesis setting.

| **Parameters** | **Value** |
| --- | --- |
| Multivariate parameters | |
|  |  |
|  |  |
|  |  |
|  |  |
|  |  |
|  |  |
| Functions of multivariate parameters | |
|  |  |
|  |  |
|  |  |
|  |  |
| Optimal-combination parameters | |
|  |  |
|  |  |
|  |  |
|  |  |
|  |  |

Table E.2.: Validation criterion probabilities used in the main simulation study in order to control the Type-I error at 0.05.

|  | **Complete Uninformative** | **Intermediate Bayes [Independent]** | **Intermediate Bayes [Dependent]** | **Complete Bayes** |
| --- | --- | --- | --- | --- |
|  | |  |  |  |
| **2.5% Development Study** | |  |  |  |
| **N=100** | 0.0791 | 0.1091 | 0.2428 | 0.2776 |
| **N=400** | 0.0786 | 0.1506 | 0.1943 | 0.2539 |
| **N=800** | 0.1043 | 0.1883 | 0.2023 | 0.2791 |
| **50% Development Study** | |  |  |  |
| **N=100** | 0.0777 | 0.1133 | 0.1219 | 0.1493 |
| **N=400** | 0.0865 | 0.1627 | 0.0989 | 0.1535 |
| **N=800** | 0.0992 | 0.1837 | 0.1076 | 0.1709 |
| **97.5% Development Study** | |  |  |  |
| **N=100** | 0.1064 | 0.1437 | 0.0545 | 0.0766 |
| **N=400** | 0.0997 | 0.1790 | 0.0516 | 0.1006 |
| **N=800** | 0.1185 | 0.2061 | 0.0635 | 0.1213 |
|  | |  |  |  |
|  | |  |  |  |
| **2.5% Development Study** | |  |  |  |
| **N=100** | 0.0754 | 0.0997 | 0.1553 | 0.1711 |
| **N=400** | 0.0852 | 0.1520 | 0.1226 | 0.1910 |
| **N=800** | 0.1031 | 0.1936 | 0.1303 | 0.2111 |
| **50% Development Study** | |  |  |  |
| **N=100** | 0.1051 | 0.1328 | 0.1091 | 0.1260 |
| **N=400** | 0.0980 | 0.1909 | 0.0832 | 0.1558 |
| **N=800** | 0.1119 | 0.2199 | 0.0993 | 0.1819 |
| **97.5% Development Study** | |  |  |  |
| **N=100** | 0.0795 | 0.1011 | 0.0324 | 0.0443 |
| **N=400** | 0.0884 | 0.1520 | 0.0349 | 0.0690 |
| **N=800** | 0.1109 | 0.1942 | 0.0469 | 0.1003 |

Technical Appendix F: Traceplot examples:

F.1 Development study

Figure F1 shows the traceplots for the fit of the 50-percentile development data set. The 20.000 retained iterations for three chains are shown for a selection of parameters. In Figure F1, the traceplots for , , and are shown. All chains are mixing well and appear to have established convergence. This was also confirmed more formally by convergence statistics.

Figure F1. Traceplots for parameters , θ, , and of the development study leading to the median posterior point estimate. Every sample is shown as a function of iteration number for each of the three chains indicated by different shades of grey.

F.2 Validation study

Figure F2 shows the traceplots for the fit of a randomly selected validation data set. The 20,000 retained iterations for five chains are shown for all parameters. In Figure F2, the traceplots for , , , and are shown. All chains are mixing well and appear to have established convergence. This was also confirmed more formally by convergence statistics.

Figure F2. Traceplots for parameters , θ, , and of a randomly selected validation study. Every sample is shown as a function of iteration number for each of the three chains indicated by different shades of grey.

Technical Appendix G: Empirical verification of the simulation-based strategy:

To check the operating characteristics of the proposed simulation-based strategy, developed under section 4.1, a simulation study was performed. The goal of this simulation study was to compare the results from the proposed strategy, obtaining and population information from the development study results, to a benchmark setting, using the true underlying and population information.

Underlying true parameter values were set as shown in Table 3. was fixed at 0.75 and the expected effect size expressed by assuming . This leads to the following hypotheses of interest:

.

In a first step, 100 development studies of size 600 were sampled based on the parameter settings described in Table 3 and Table E.1. 50 studies were sampled under the alternative hypothesis, i.e. as in Table 3, the remaining 50 were coming from the null hypothesis, i.e. as described in Table E.1. All 100 development study data sets were fitted by applying the priors and model described in section 2.1. For each of the 100 development studies the result can then be used to simulate power conditional on the development study results.

Validation-criterion probability

In order to proceed to testing the considered hypotheses, validation-criterion probability needs to be set. As described in Technical Appendix E, was chosen to control Type-I error to 0.05 conditionally on the prior distribution assumed for . In order to have an estimate of the conditional , validation studies satisfying are required. In the benchmark setting, one could just sample 400 validation studies based on the underlying true parameters. For the proposed simulation-based strategy, however, these validation studies are sampled based on the available data from the particular development study. In particular, the point estimate for parameter is shifted in order to ensure , while fixing the point estimates of the remaining parameters.

Next, for every development study, the obtained posterior is approximated by a normal density and discarded by increasing its standard deviation by 200%. This discarded normal distribution is then used as the prior for in fitting each of the simulated validation studies, i.e. 400 benchmark studies and 400 proposed simulation-based strategy studies. The resulting posteriors are then employed to estimate that which ensures a Type-I error of only 0.05. The resulting estimates, obtained by the benchmark as well as the simulation-based strategy validation studies, for each of the 100 development studies are denoted in Figure G1 and Figure G2.

The mean epsilon of the 50 development studies (indicated in green) is equal to 0.15 and 0.19 for the benchmark and simulation-based strategy, respectively. The corresponding 95% empirical equal tail intervals are, respectively, (0.08;0.25) and (0.08;0.34) for the benchmark and simulation-based strategy. For the development studies (indicated in red) the mean epsilon value is equal to 0.12 and 0.11 for the benchmark and simulation-based strategy, respectively. The corresponding empirical 95% equal tail intervals are, respectively (0.07;0.21) and (0.05;0.22) for the benchmark and simulation-based strategy.

From Figure G1. it can be seen that for the development studies the estimated epsilons are on average somewhat larger compared to the estimates for the development studies, both for the benchmark as simulation-based strategy estimates. Although the difference would not be considered statistically significant, this is expected, since the discrepancy between the prior coming from the population and the validation study sampled from , causes a shift in the posterior . Consequently this shift needs to be compensated more in the development study setting to ascertain a Type-I probability of 0.05.

Considering the agreement between the benchmark estimates and the simulation-based strategy estimates, it is clear from Figure G1. that for both development study settings, the estimates lie close to the diagonal. This observation is confirmed by Figure G2. were the bias in both development settings is small. Moreover, compared to the variability within each development study and validation sampling setting combination, the limits of agreement could be interpreted as narrow. Leading to the conclusion that the proposed simulation-based strategy leads to estimates of validation-criterion probabilities which are sufficiently close to the benchmark estimates to proceed to investigate the performance of the simulation-based strategy in estimating the power.

Figure G1.: The estimated validation-criterion probabilities for each of the 100 simulated development studies, based on 400 validation studies simulated using the proposed simulation-based strategy versus the estimates coming from the benchmark validation studies. development studies are indicated in green, development studies in red. Vertical and horizontal colored dashed lines denote the mean epsilon in the benchmark and simulation-based strategy, respectively.

Figure F2.: Bland-Altman plot of the benchmark versus simulation-based strategy epsilon estimates. Green symbols denote epsilon estimates from the development studies, red symbols from the development studies.

Power

A similar strategy is applied to obtain estimates of power, conditionally on the considered development study. For the benchmark validation studies, 400 studies are simulated from the true underlying population based on the parameter values shown in Table 3. The 400 simulation-based strategy validation studies are simulated based on the obtained point estimates of each parameter from the development study fit, while adjusting the point estimate of , in order to ensure that. By fitting the validation model to the simulated validation data sets, we can estimate the power to correctly reject the considered null hypothesis under the assumption that the effect size is characterized by and employing the conditional estimates ensuring that the Type-I error probability is equal to 0.05 irrespectively of development study.

Results of this exercises are summarized in Figure G3. and G4. The mean estimated power for the development studies are 0.19 and 0.19 for the benchmark and simulation-based strategy, respectively. The respective corresponding empirical 95% equal tail intervals are (0.14;0.27) and (0.10;0.27). For the development studies the mean estimated power for the benchmark and simulation-based strategy are 0.19 and 0.21, respectively. The respective corresponding 95% empirical equal tail intervals are (0.13;0.23) and (0.13;0.30) for the benchmark and simulation-based strategy.

Concerning the observed effect of the development study setting on the epsilon estimates, it can be seen from the Figure G3 that in terms of power this effect is absent. This observation shows that correcting for a difference in Type-I error probability caused by a difference in prior (development study) by choosing the appropriate , leads to comparable power estimates. Moreover, the marginally normal shape of the power estimates indicates that irrespective of the development study, the procedure is estimating a single true population power.

In terms of the agreement between the benchmark estimates and the simulation-based strategy estimates, it is clear from Figure G3. that for both development study settings, on average the estimates lie close to the diagonal. This observation is confirmed by Figure G4. were it can be seen that the bias in both development settings is small. Moreover, compared to the variability within each development study and validation sampling setting combination, the limits of agreement could be interpreted as narrow. Leading to the conclusion that the proposed simulation-based strategy leads to power estimates which are sufficiently close to the benchmark estimates. In other words, estimating the power to validate the results from a development study based on validation studies sampled from parameters derived from that development study, leads to results in sufficiently close agreement with the results based on the true underlying populations.

Figure G3.: The estimated power for a validation study of size 400 with a Type-I probability equal to 0.05 for each of the 100 simulated development studies, based on 400 validation studies with simulated using the proposed simulation-based strategy versus the estimates coming from the benchmark validation studies. development studies are indicated in green, development studies in red. Vertical and horizontal colored dashed lines denote the mean power in the benchmark and simulation-based strategy, respectively.

Figure G4.: Bland-Altman plot of the benchmark versus simulation-based strategy power estimates. Green symbols denote epsilon estimates from the development studies, red symbols from the development studies.

APPENDIX REFERENCES

Mathai A.M., Provost S.B. (1992), *Quadratic forms in random variables*, New York, USA: Marcel Dekker Inc.

Ruben H. (1962), “Probability Content of Regions Under Spherical Normal Distributions, IV: The Distribution of Homogeneous and Non-homogeneous Quadratic Functions of Normal Variables,” *The Annals of Mathematical Statistics*, 33, 542-570.
